# Supplementary material for: RNA Sequencing for Personalized Treatment of Metastatic Leiomyosarcoma: Case Report
Source: PubMed Central journal article supplement (PMC8435728; doi:10.3389/fonc.2021.666001), 2021-08-30

GO terms for top-100 genes

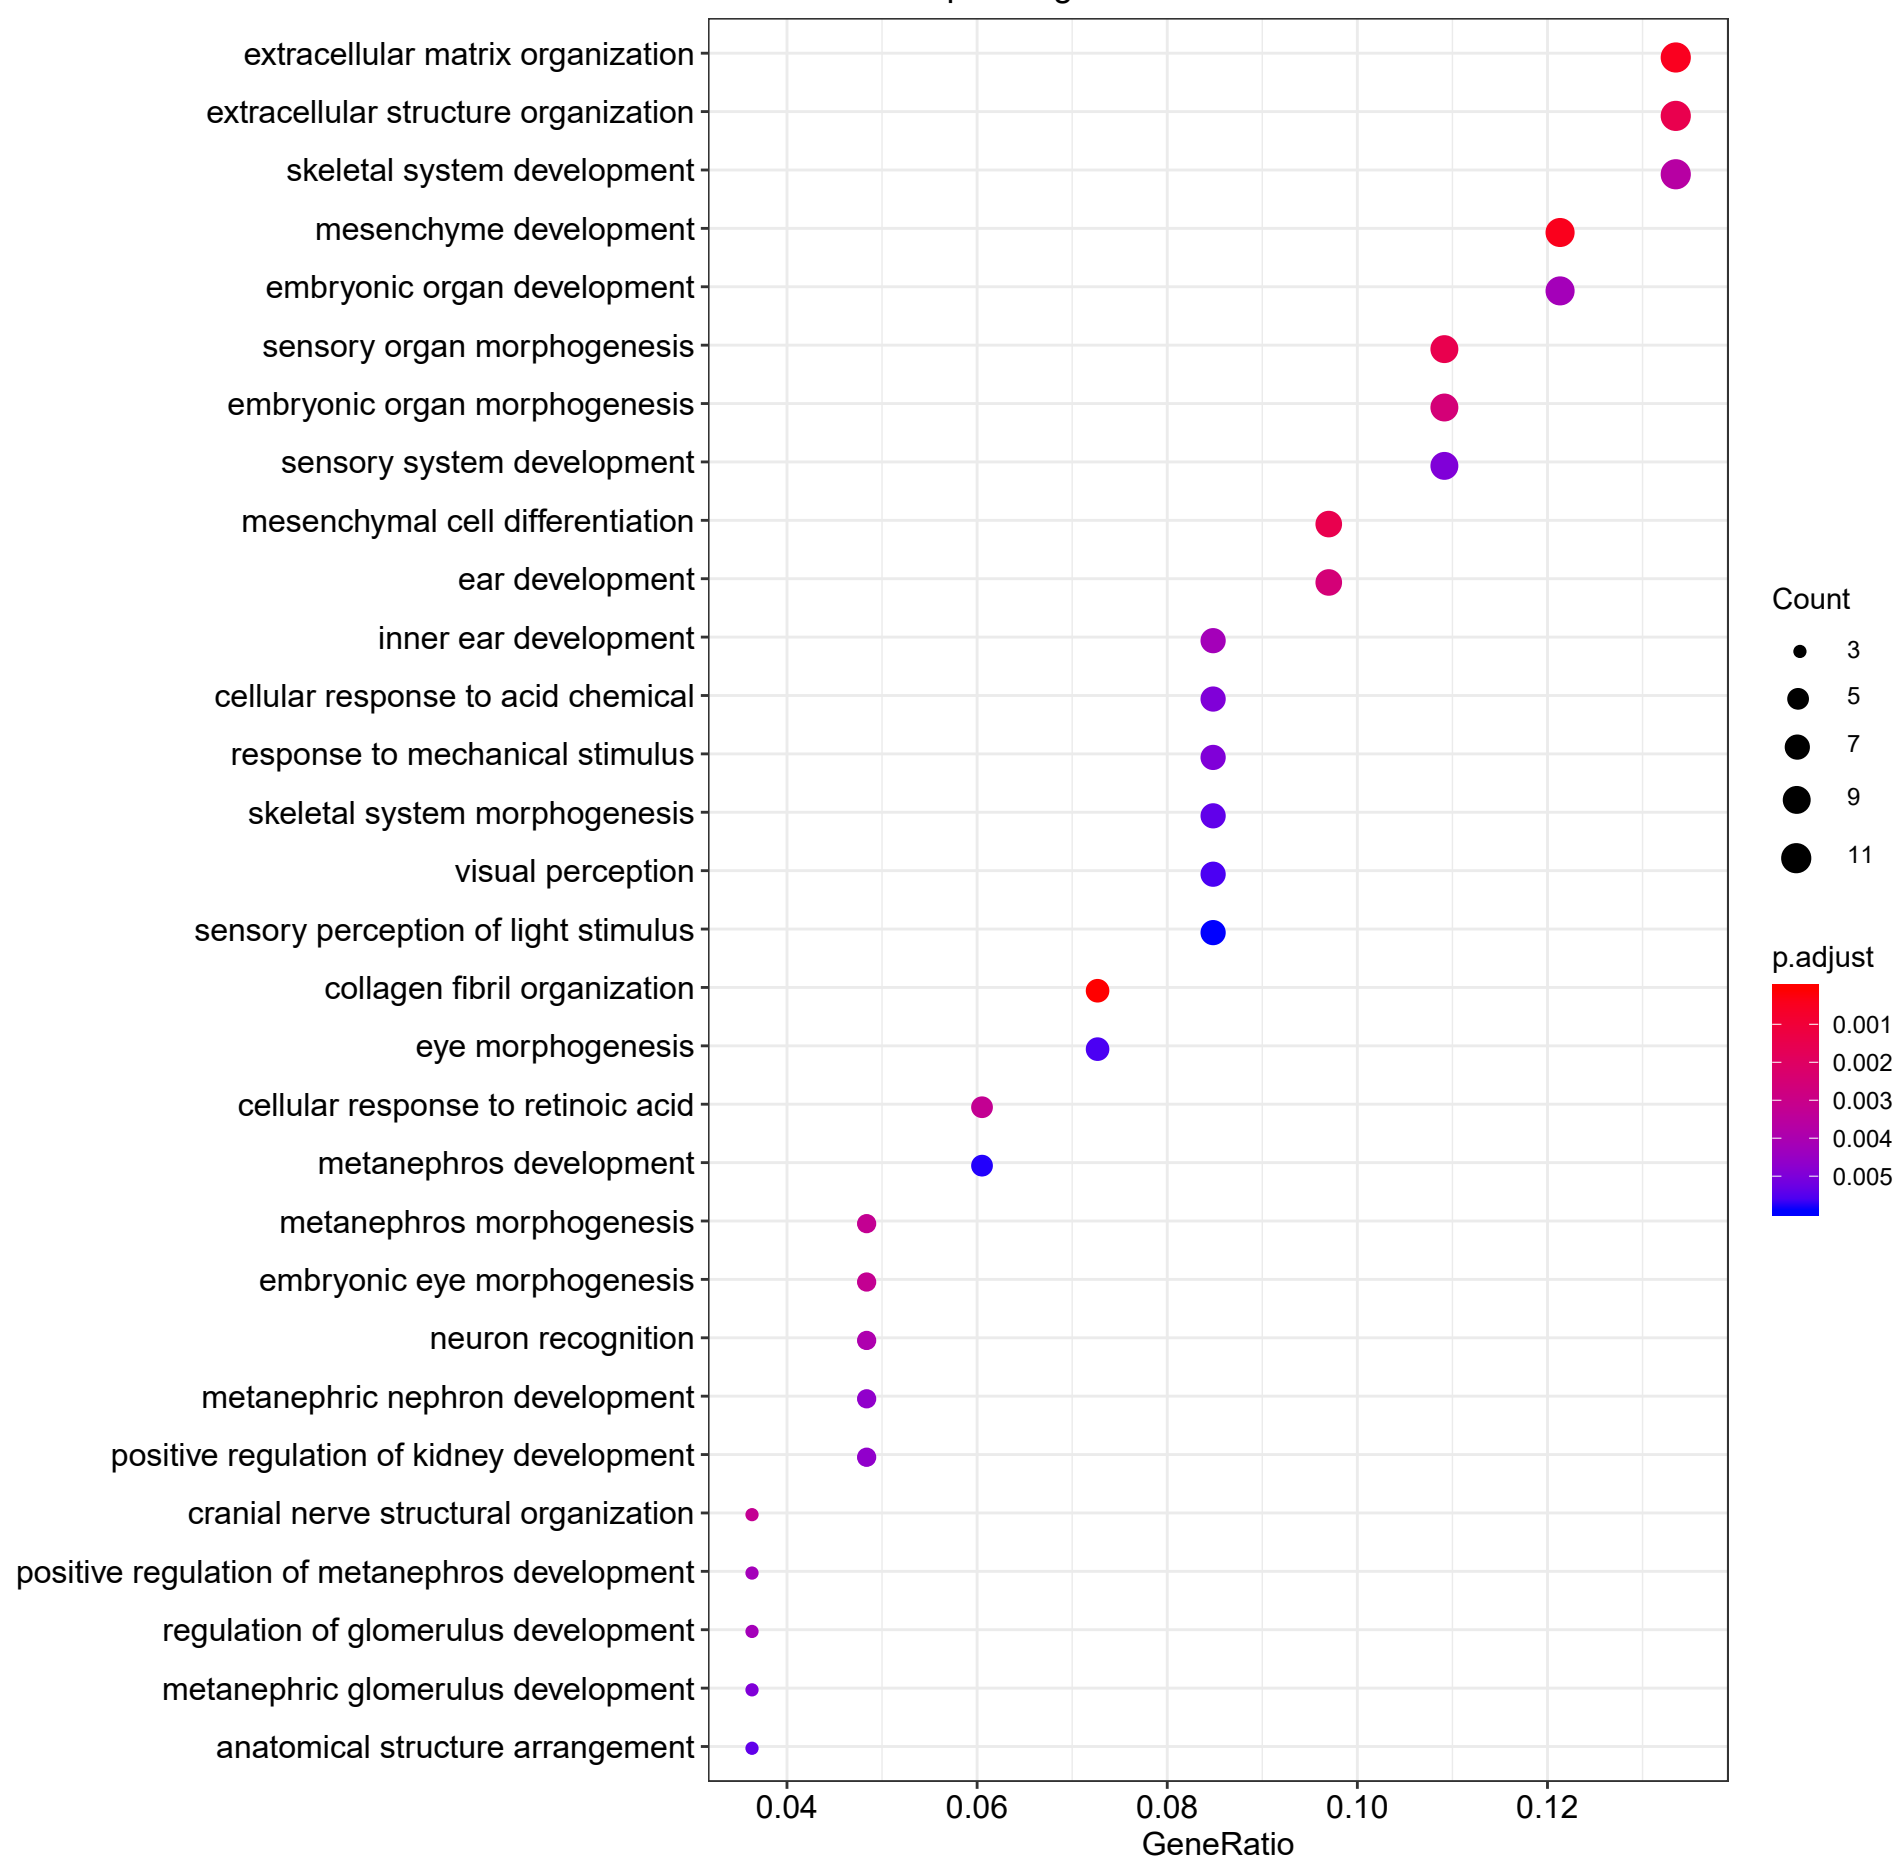

GO terms for bottom-100 genes

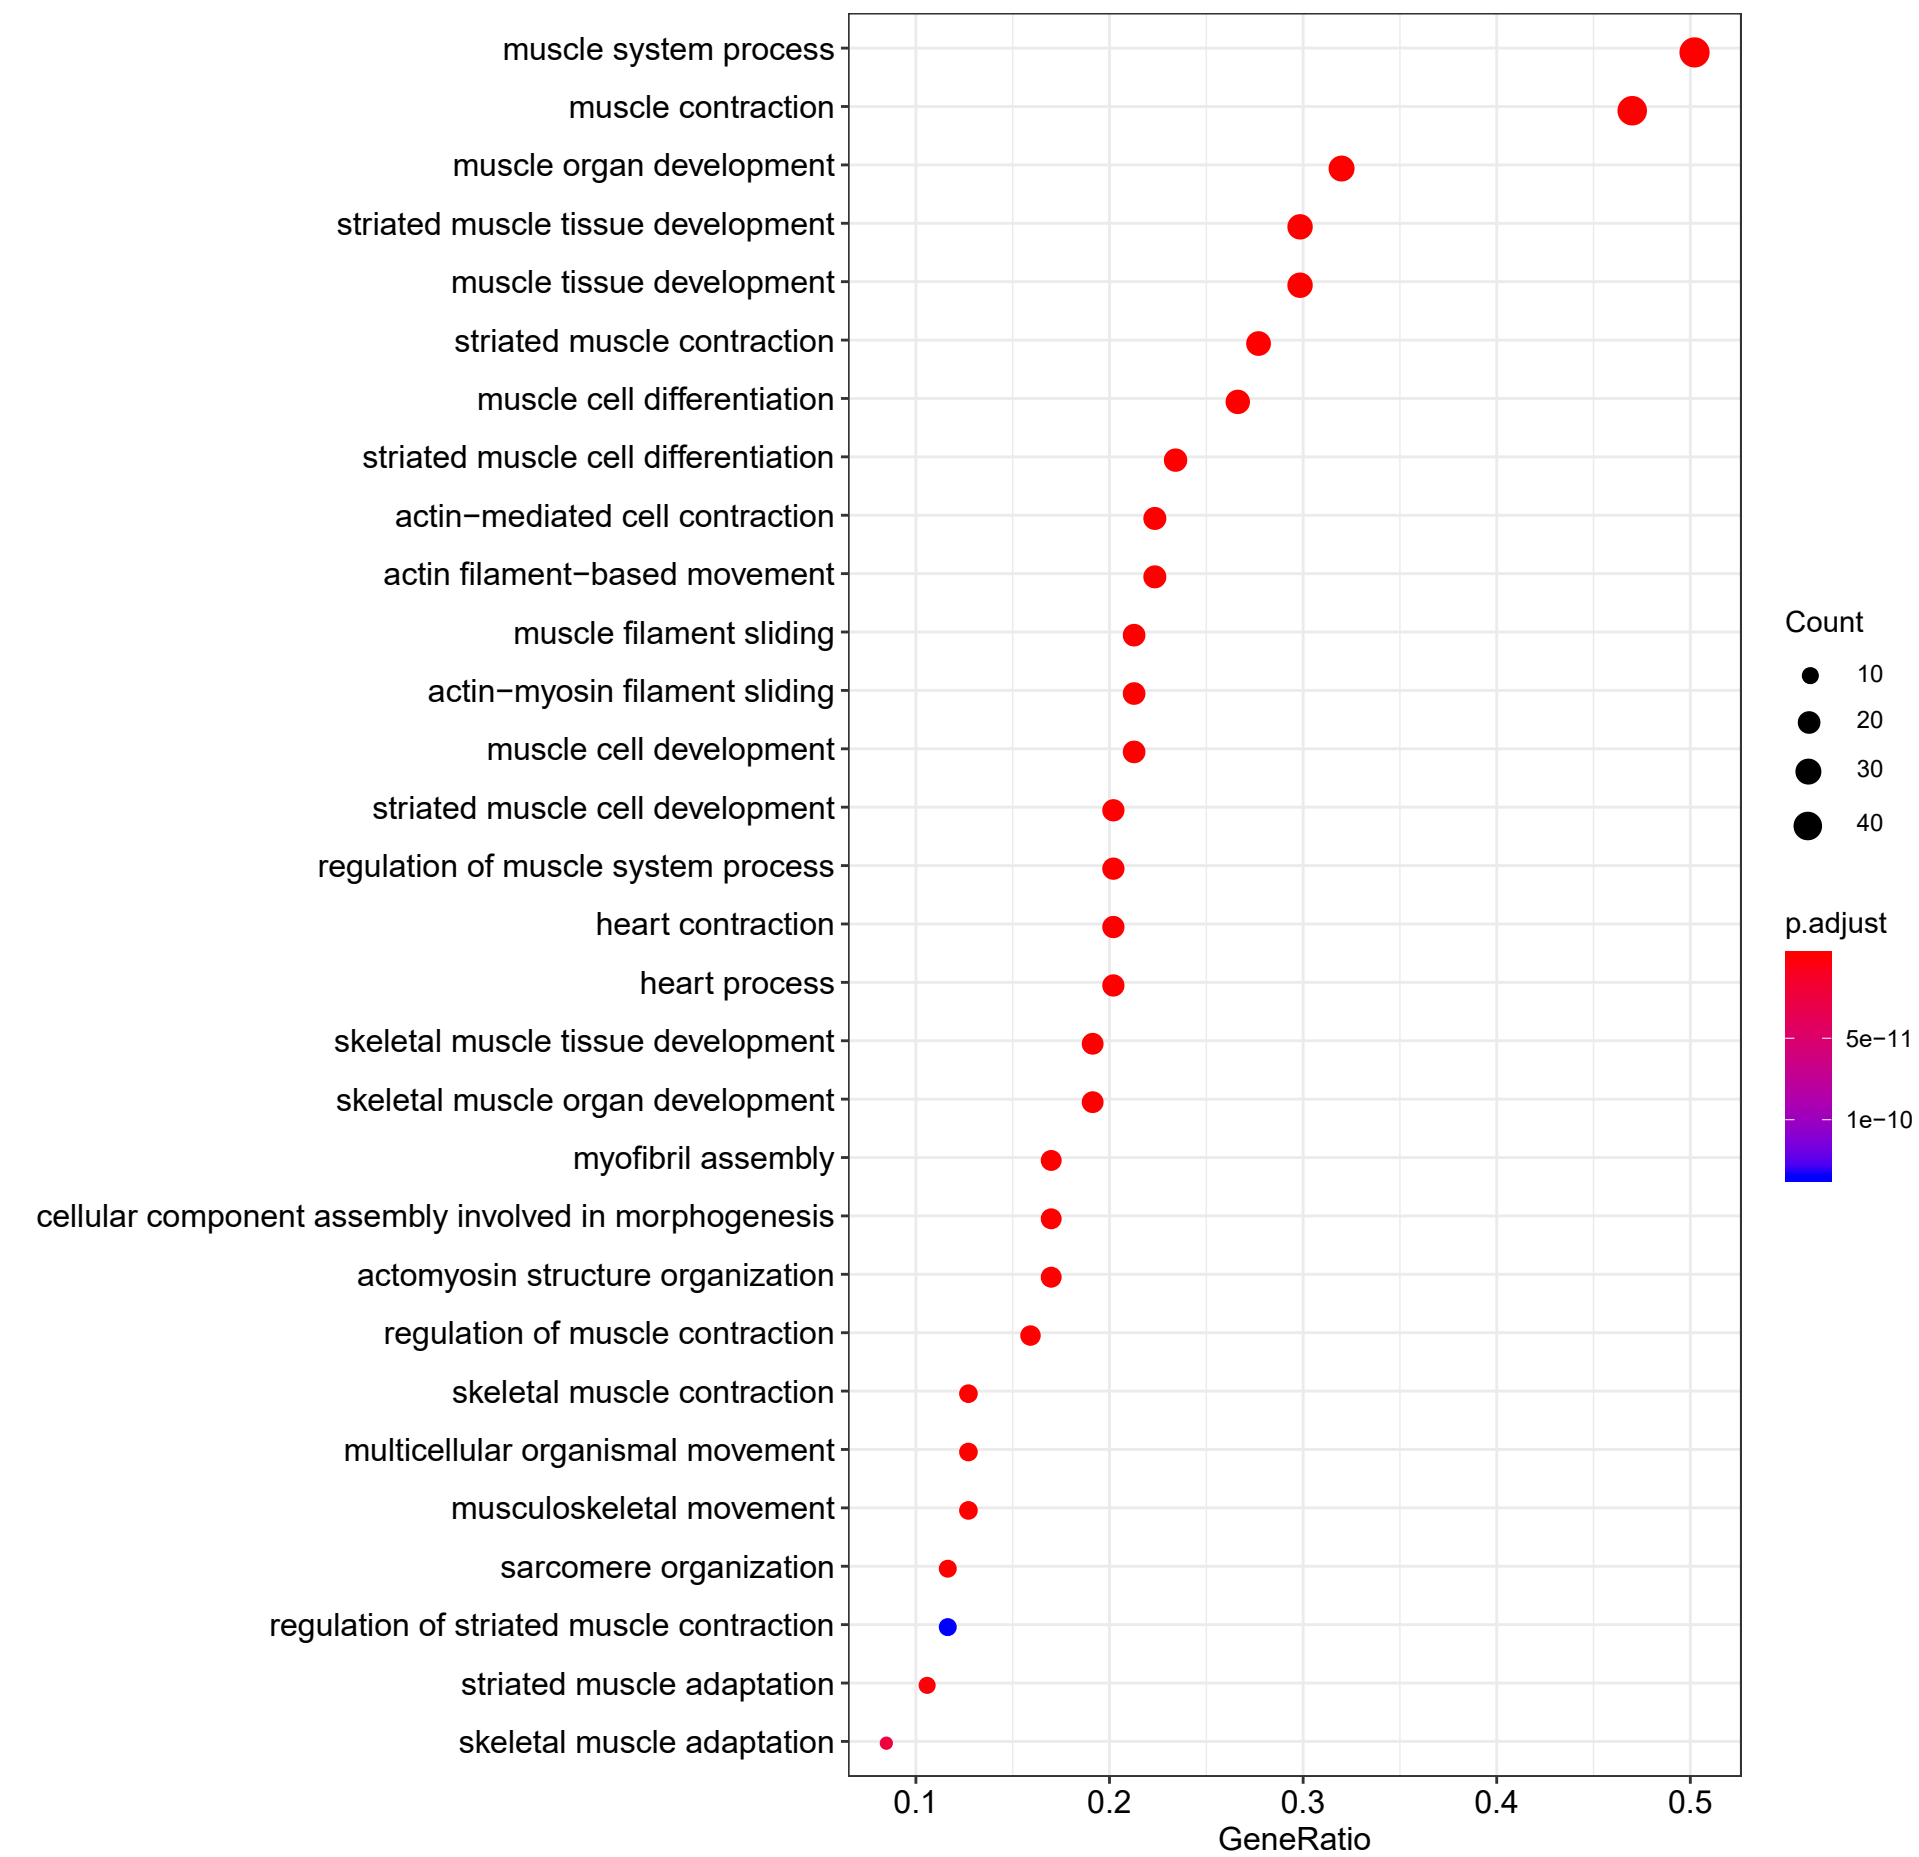

Supplement: Image_4.pdf [file Image_4.pdf]
